# Supplementary material for: Indications for Three Independent Domestication Events for the Tea Plant (Camellia sinensis (L.) O. Kuntze) and New Insights into the Origin of Tea Germplasm in China and India Revealed by Nuclear Microsatellites
Source: PLOS journal article supplement (doi:10.1371/journal.pone.0155369), 2016-05-24
Supplement: S3 (10.1371/journal.pone.0155369.s003) [file journal.pone.0155369.s003]

**S3 Fig: Results of the STRUCTURE analysis after regrouping**

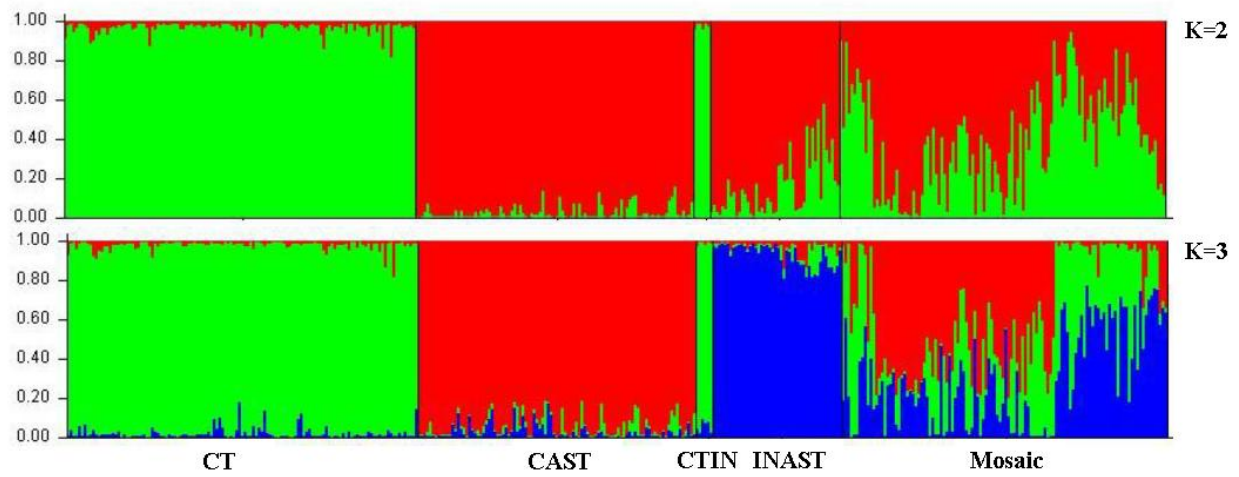

Results of structure analysis for  $K=2$  and  $K=3$  for the regrouped dataset of 392 tea samples collected from China and India. Abbreviations: CT: China tea; CAST: Chinese Assam tea; CTIN: China tea in India; INAST: Indian Assam tea; Mosaic: Mosaic group
